# Supplementary material
Source: publisher site journal article supplement (https://www.dovepress.com/article/530238)
Supplement: Supplementary file 1 [file 530238%20Revised%20Appendix.docx]

**Appendix Transcription Symbols**

The following is a list of transcription symbols adapted from the Jeffersonian system standard in Conversation Analysis (Jefferson, 2004).

| (( )) | Double parentheses enclose descriptions of conduct |
| --- | --- |
| (.) | a brief noticeable pause |
| (1.7) | A pause in speech (timed in seconds) |
| - | A hyphen after a word or a part of a word indicates a cut-off or self-interruption |
| word [word]  [word] | Square brackets denote the onset and end of overlapping talk |
| WORD | Text in capitals denotes loudness in volume |
| word | underlined text indicates the speaker is emphasizing or stressing the speech |
| owordo | Degree symbols around text denote softness in volume |
| <word word> | Outward arrows denote faster speech than usual for the speaker |
| >word word < | Inward arrows denote slower speech than usual for the speaker |
| = | Equal sign shows that there is no discernible pause between the turns of the two speakers |
| : | A colon denotes the elongation or stretch of the preceding sound |
| ↓ | A downward arrow precedes a marked fall in pitch |
| ↑ | An upward arrow precedes a marked rise in pitch |
| → | Analyst drawing the reader’s attention to a significant line |
